# Supplementary material for: 1H and 195Pt NMR prediction for inclusion compounds formed by cisplatin and oxidized carbon nanostructures
Source: Royal Society of Chemistry journal article supplement (doi:10.1039/d0ra06044e), 2020-12-24
Supplement: d0ra06044e3.pdf [file d0ra06044e3.pdf]

# $^1\text{H}$ and $^{195}\text{Pt}$ NMR Prediction for Inclusion Compounds Formed by Cisplatin and Oxidized Carbon Nanostructures

Leonardo A. De Souza<sup>a,\*</sup>, Eduardo R. Almeida<sup>b</sup>, Diego F. S. Paschoal<sup>c</sup>, Jadson C. Belchior<sup>a</sup>, Hélio F. Dos Santos<sup>b</sup>, Wagner B. De Almeida<sup>d</sup>

<sup>a</sup> Departamento de Química, ICEx, Universidade Federal de Minas Gerais, Campus Universitário, Pampulha, Belo Horizonte, MG 31270-901, Brazil.

<sup>b</sup> Núcleo de Estudos em Química Computacional (NEQC), Departamento de Química, ICE, Universidade Federal de Juiz de Fora, Campus Universitário, Martelos, Juiz de Fora, MG 36036-330, Brazil.

<sup>c</sup> Núcleo de Química Teórica e Computacional de Macaé (NQTCM), Polo Ajuda, Universidade Federal do Rio de Janeiro, Campus UFRJ-Macaé, 27.971-525, Macaé, RJ, Brazil.

<sup>d</sup> Laboratório de Química Computacional e Modelagem Molecular (LQC-MM), Departamento de Química Inorgânica, Instituto de Química, Universidade Federal Fluminense, Campus do Valonguinho, Centro, Niterói, RJ 24020-141, Brazil.

## Supplementary Material

\* Corresponding author: [desouza.leonardo.chem@gmail.com](mailto:desouza.leonardo.chem@gmail.com) (L.A. De Souza)

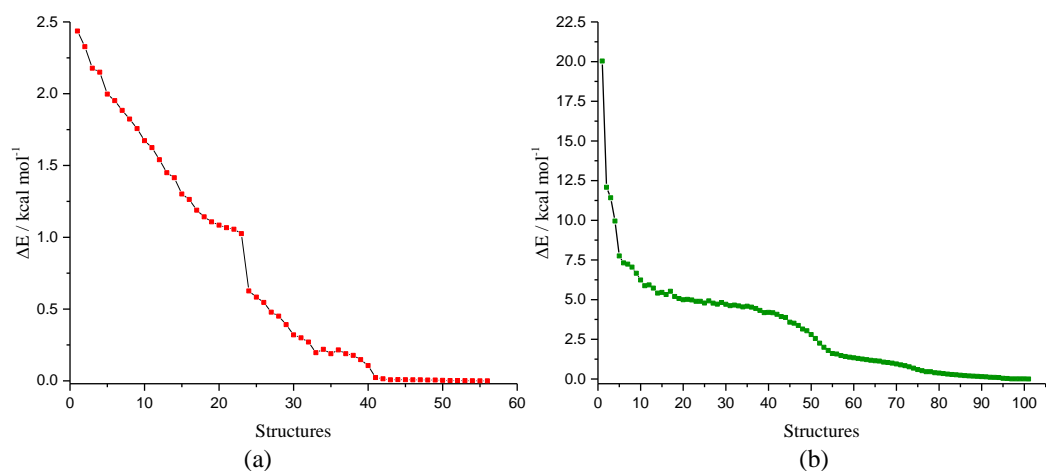

**Figure S1.** B3LYP/LANL2DZ/def2-SVP/IEF-PCM(UFF) potential energy curve for the geometry optimization process of cDDP@CNTox (a) and cDDP@CNCox (b) complexes.

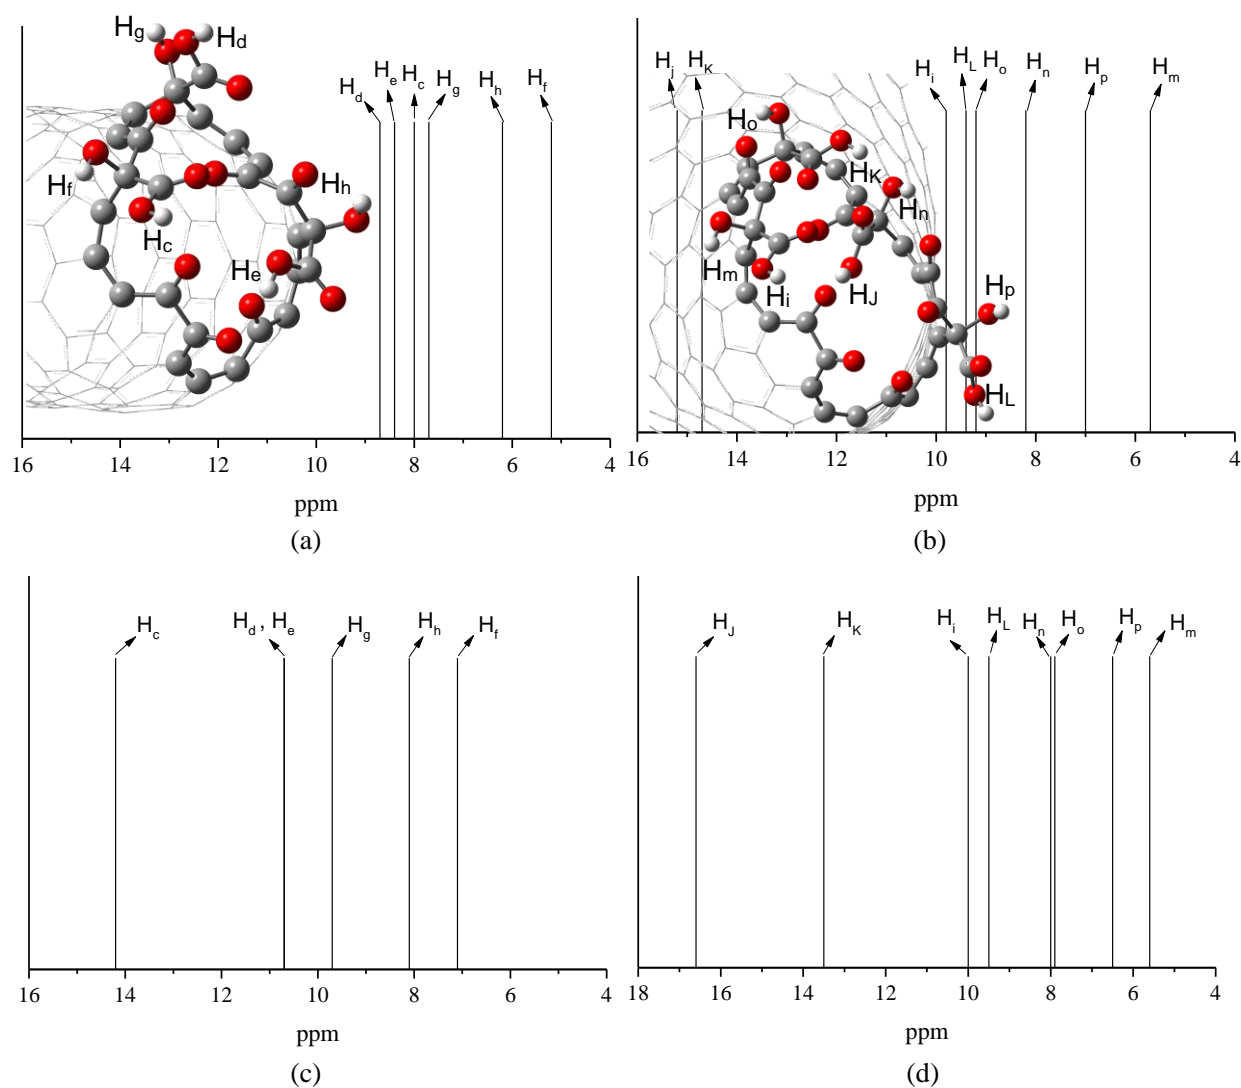

**Figure S2.** PBE/PBE/NMR-DKH/IEF-PCM(UFF)  $^1\text{H}$  NMR spectra for the oxidized region of free CNTox (a) and CNCox (b) nanostructures and its inclusion complexes (c-d), respectively. All values in ppm.

In order to verify if the simulation protocol provided the equilibration of the cDDP@CNTox complex, we analyzed the temporal variation of the macroscopic properties, such as temperature, kinetic and potential energy, density, volume and pressure, as shown in Figure S3. The evolution of the root-mean-square deviation (RMSD) calculated in relation to the first structure of the production run was also included in this figure.

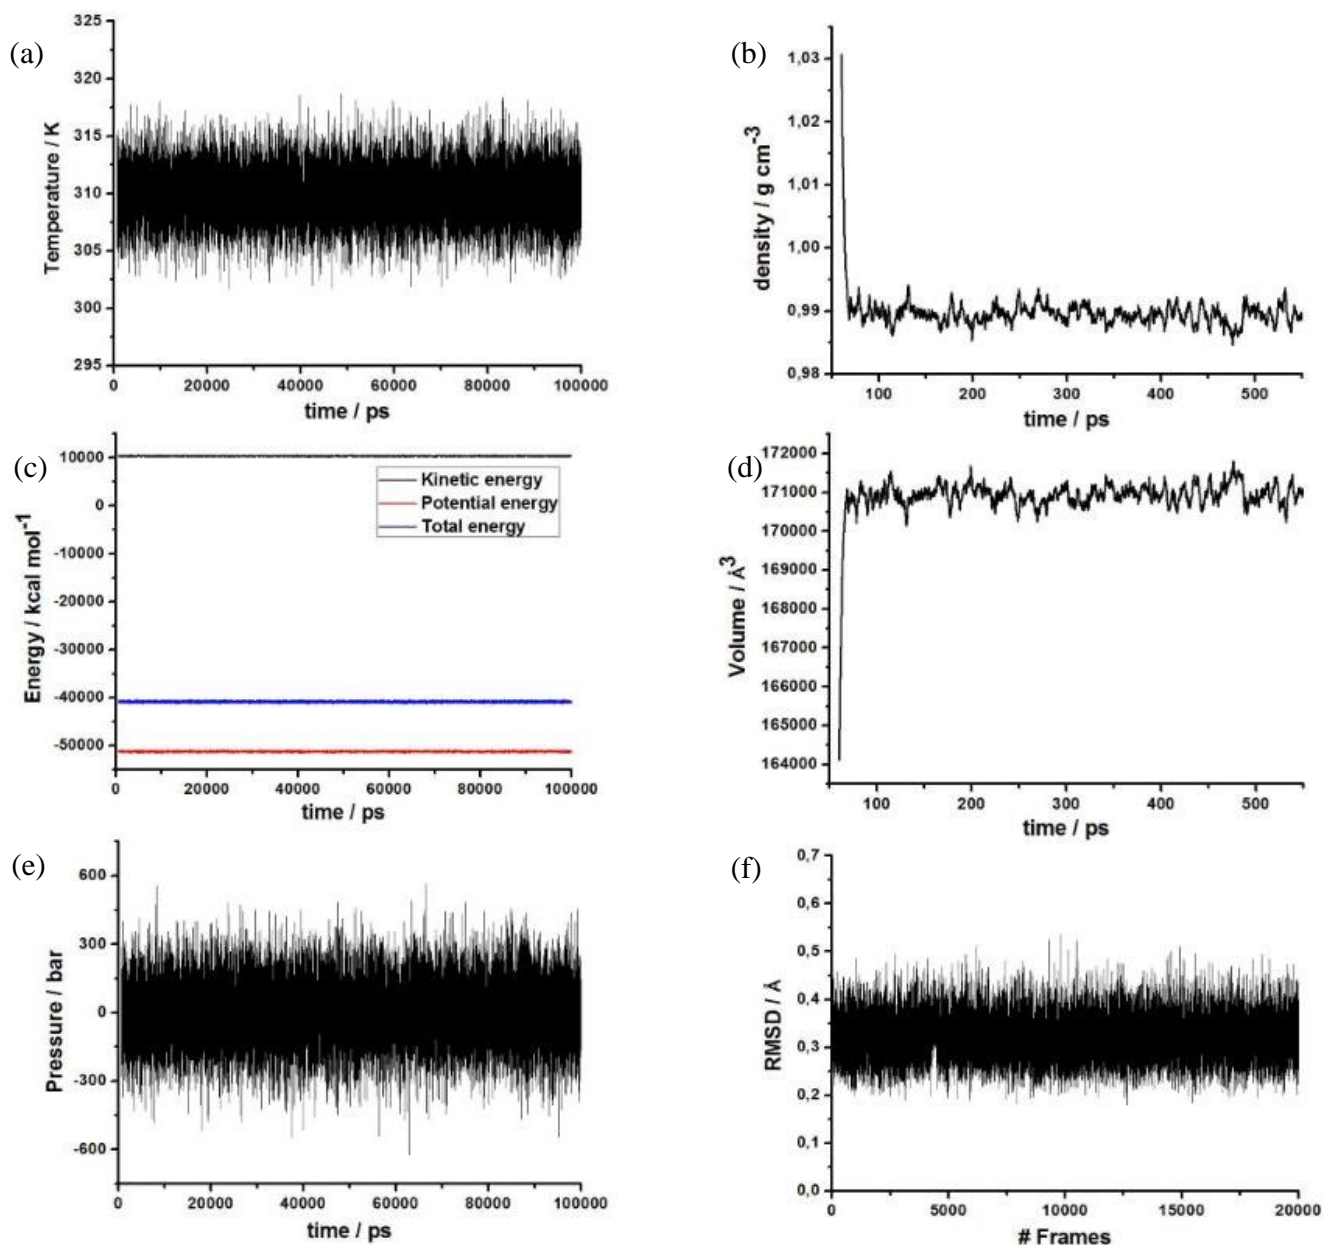

**Figure S3.** Analyzing the simulation of the cDDP@CNTox complex: the temporal variation of the temperature (a), total, kinetic, and potential energy (b), pressure (c) through the 100 ns production trajectory, density (d) and volume (e) during the last equilibration step (540 ps), and root mean square deviation (f) during the production run.

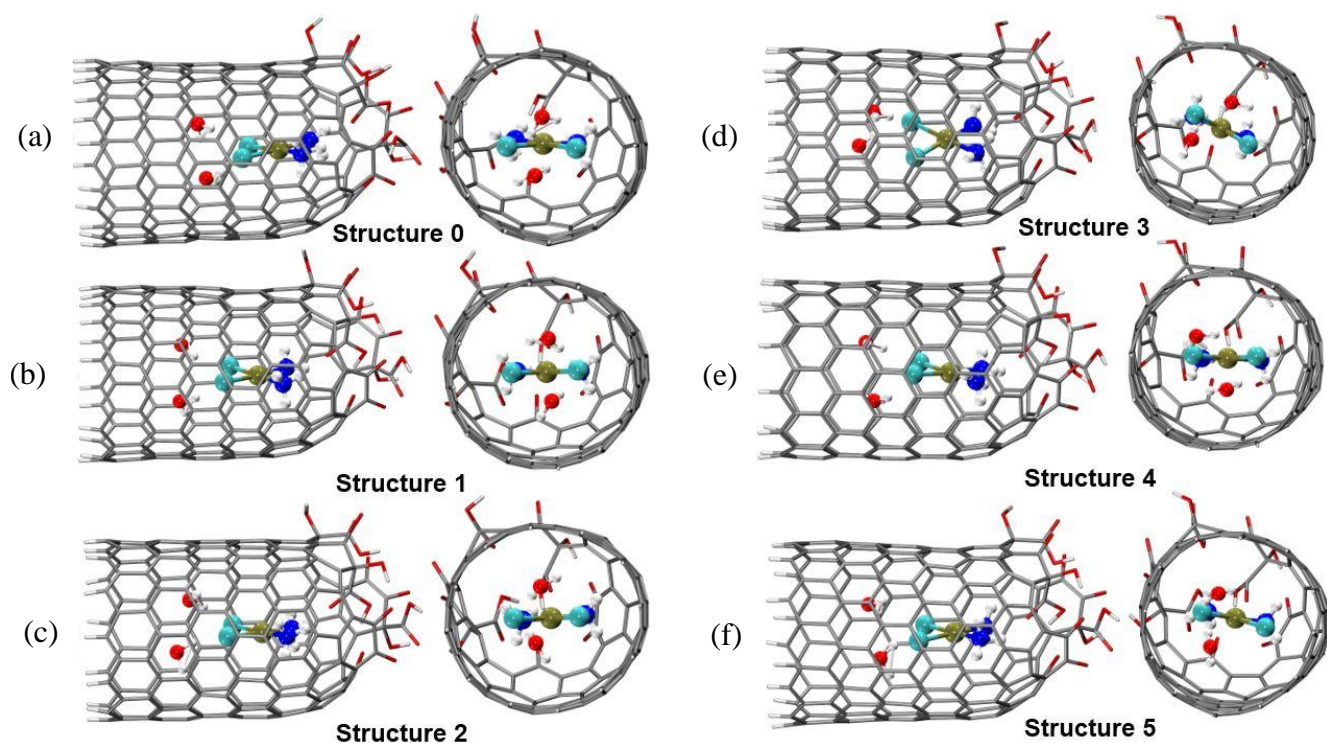

**Figure S4.** The snapshots of the first six structures (cDDP@CNTox) referring to the total set of 20 structures: Structure 0 (a), structure 1 (b), structure 2 (c), structure 3 (d), structure 4 (e), and structure 5 (f).

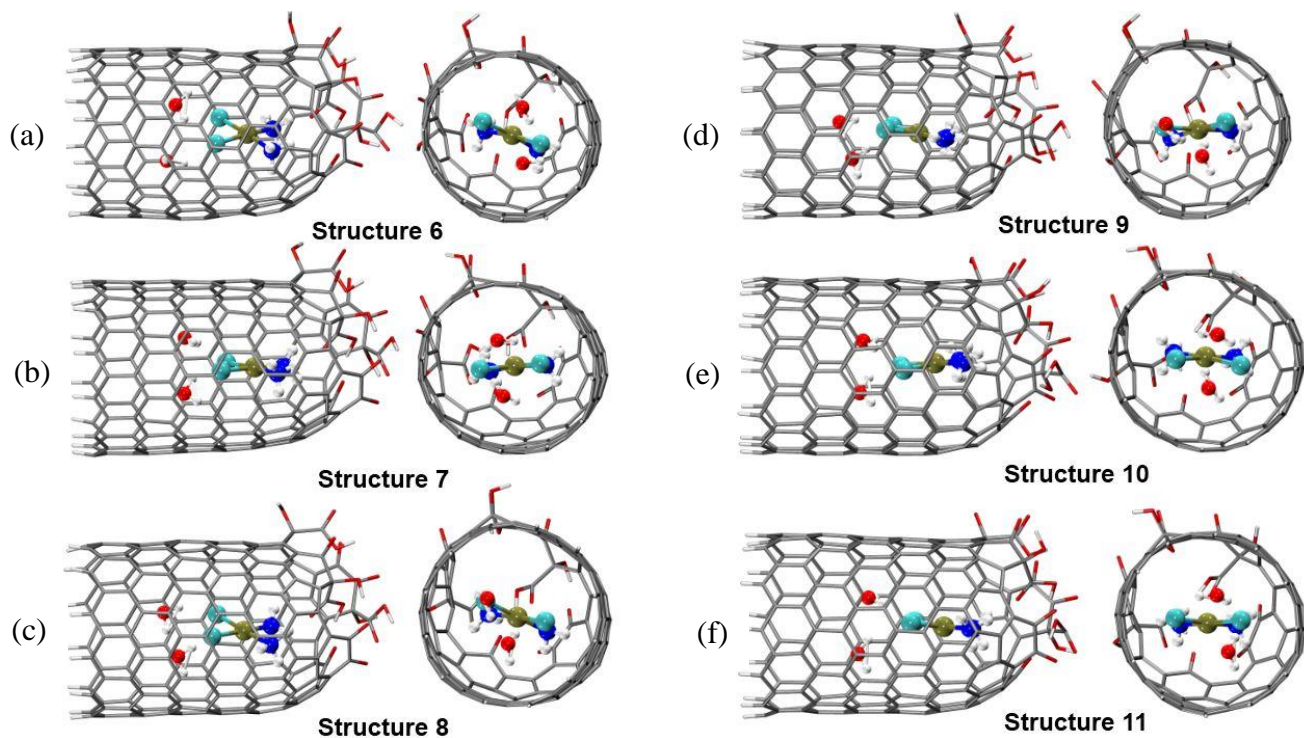

**Figure S5.** The snapshots of the structures (cDDP@CNTox) referring to the total set of 20 structures: Structure 6 (a), structure 7 (b), structure 8 (c), structure 9 (d), structure 10 (e), and structure 11 (f).

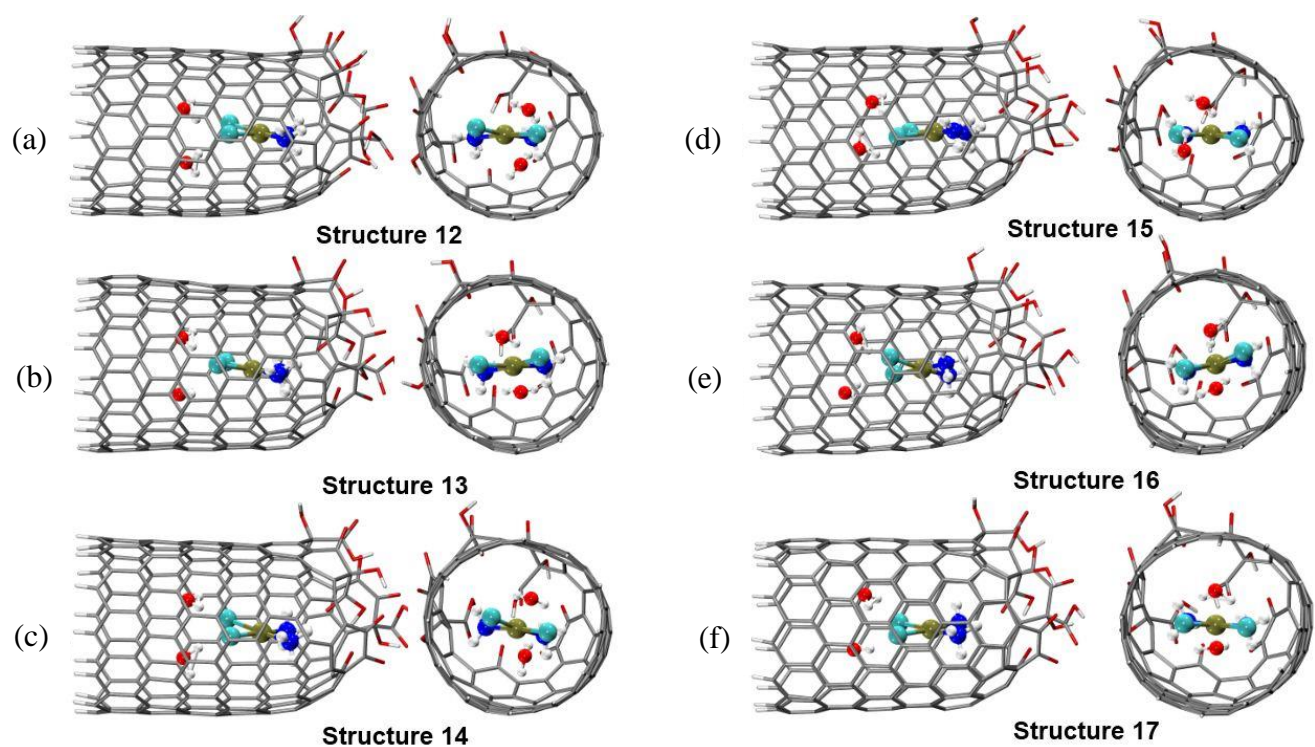

**Figure S6.** The snapshots of the structures (cDDP@CNTox) referring to the total set of 20 structures: Structure 12 (a), structure 13 (b), structure 14 (c), structure 15 (d), structure 16 (e), and structure 17 (f).

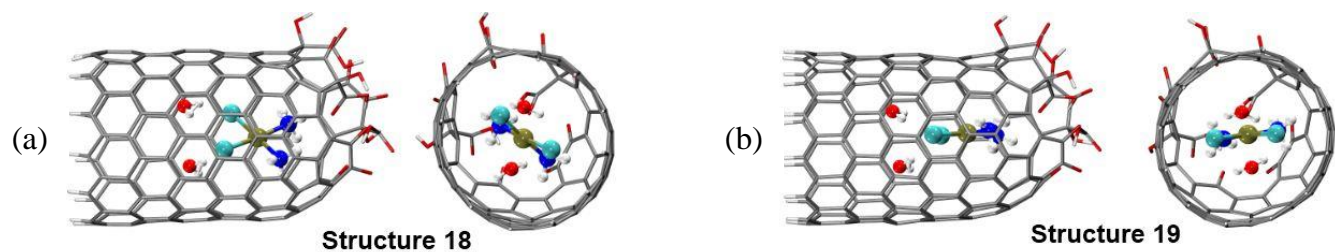

**Figure S7.** The snapshots of the last two structures (cDDP@CNTox) referring to the set of 20 structures: Structure 18 (a) and structure 19 (b).

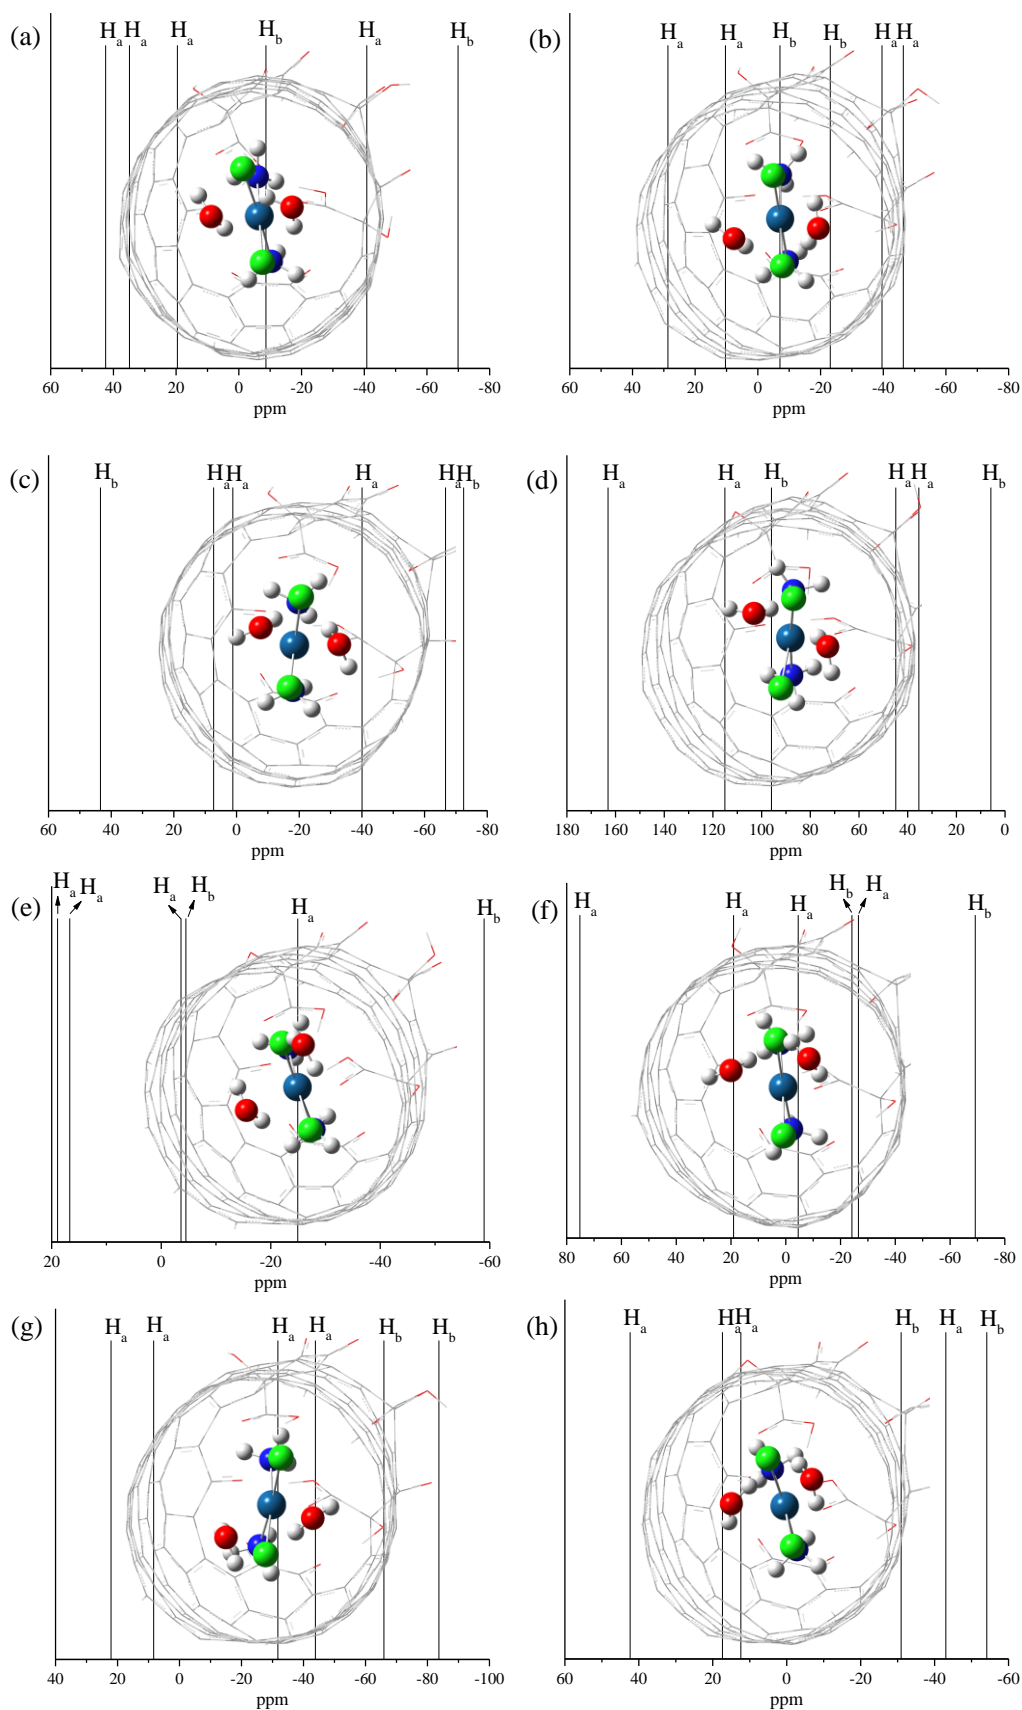

**Figure S8.** PBE/PBE/NMR-DKH/IEF-PCM(UFF)  $^1\text{H}$  NMR spectrum for cDDP in the geometry of structures 0 to 7 (a-h) obtained by MD simulation.

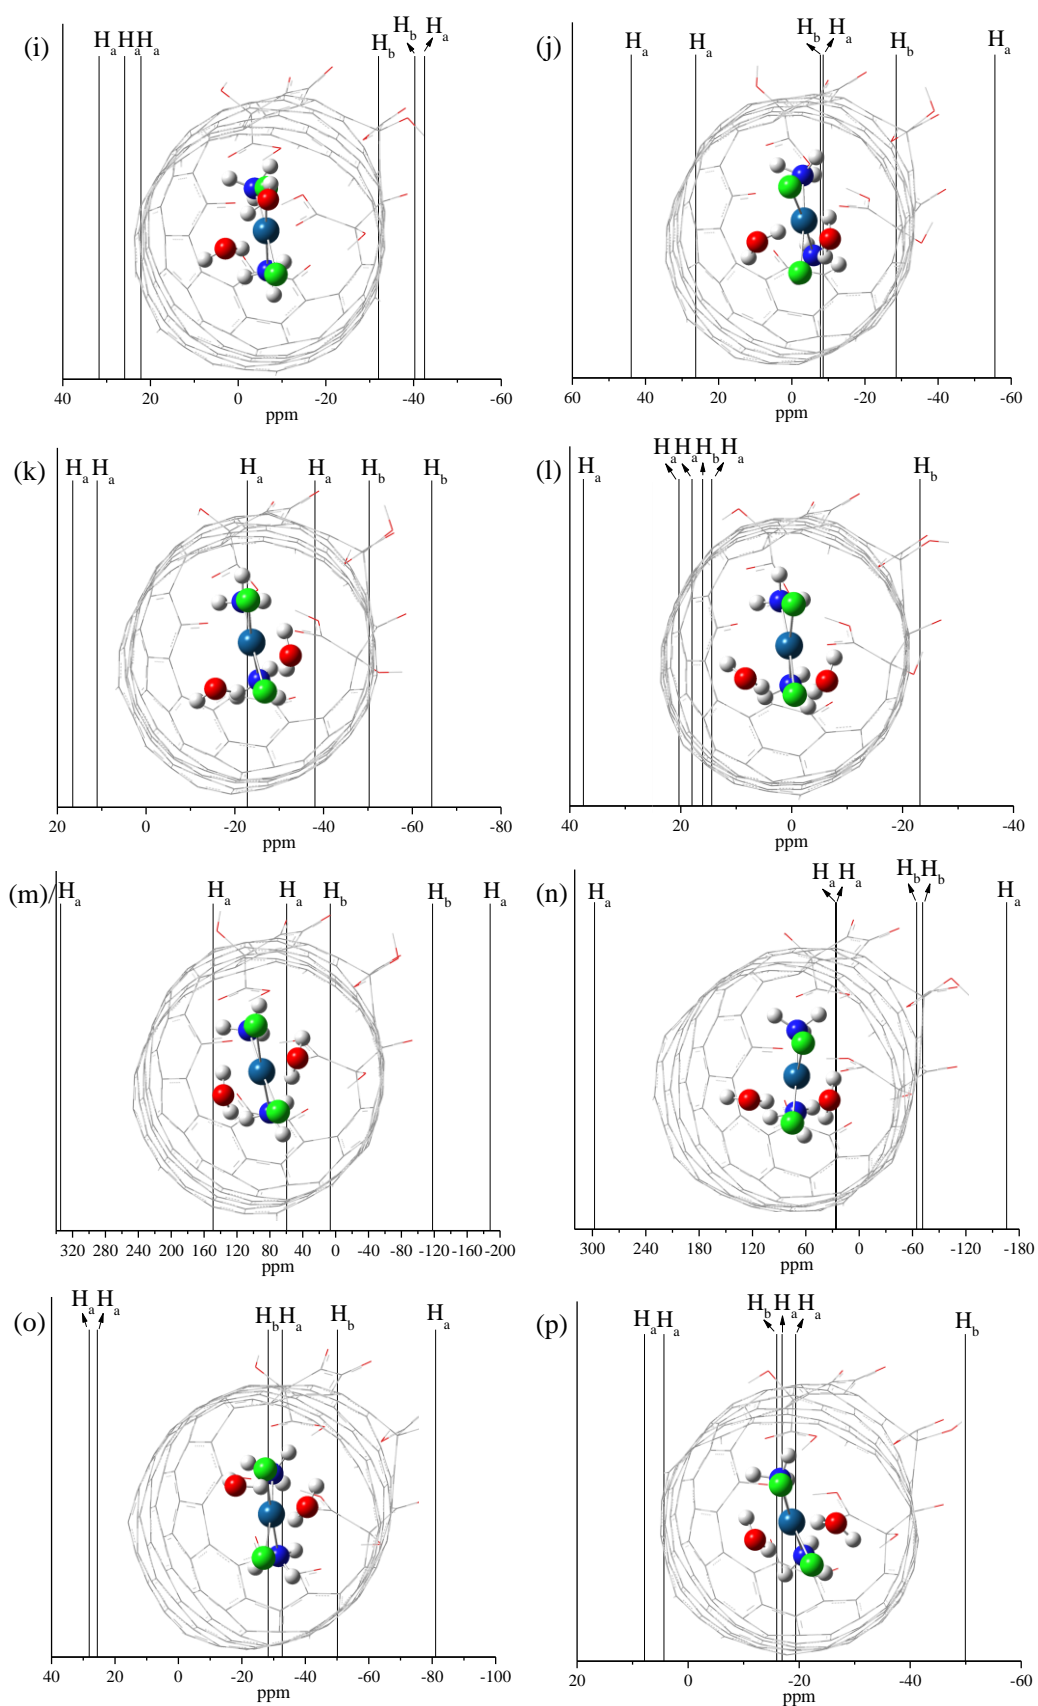

**Figure S9.** PBE/PBE/NMR-DKH/IEF-PCM(UFF)  $^1\text{H}$  NMR spectrum for cDDP in the geometry of structures 8 to 15 (i-p) obtained by MD simulation.

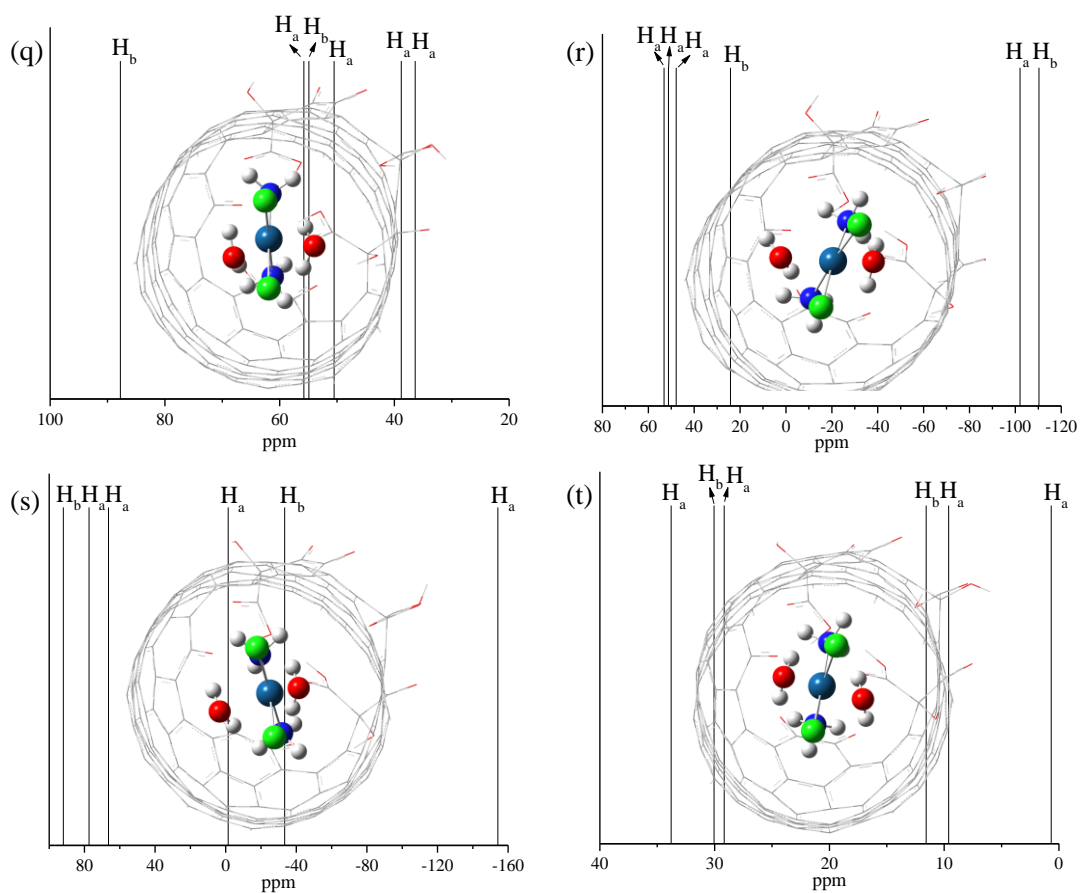

**Figure S10.** PBE/PBE/NMR-DKH/IEF-PCM(UFF)  $^1\text{H}$  NMR spectrum for cDDP in the geometry of structures 16 to 19 (q-r) obtained by MD simulation.



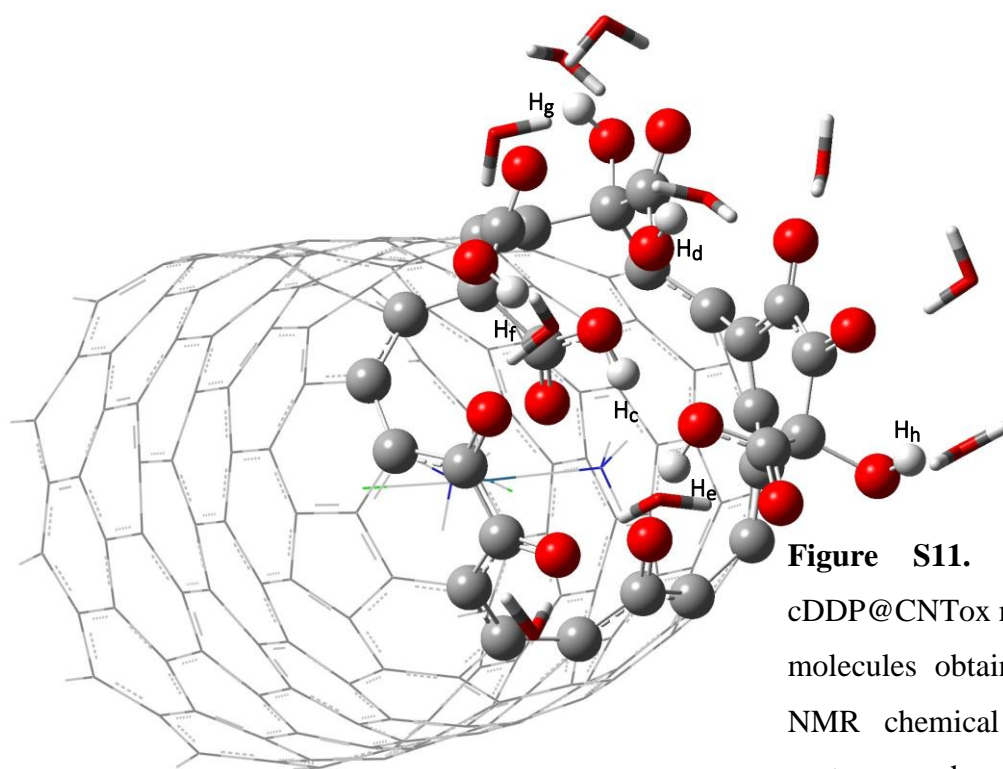

**Figure S11.** Oxidized region of the cDDP@CNTox model solvated with 10 water molecules obtained by MD simulation.  $^1\text{H}$  NMR chemical shifts of the highlighted protons are shown in Table S4.

**Table S1.** Interatomic distance ( $d$ ) between Pt (cisplatin) and C (nanostructures) atoms and its B3LYP/LANL2DZ/def2-SVP/IEF-PCM(UFF) ChelpG charges (in a.u.) in the inclusion complexes and isolated monomers geometries (in parenthesis).

| cDDP@CNTox     |                  |                                           | cDDP@CNCox     |                  |                                           |
|----------------|------------------|-------------------------------------------|----------------|------------------|-------------------------------------------|
| Atoms          | $d / \text{\AA}$ | Charge                                    | Atoms          | $d / \text{\AA}$ | Charge                                    |
| Pt             | -                | -0.2 (0.1)                                | Pt             | -                | -0.08 (0.1)                               |
| Pt --- C105    | 4.50             | 0.07 (0.05)                               | Pt --- C77     | 4.90             | 0.02 (0.06)                               |
| Pt --- C106    | 4.42             | -0.07 (-0.08)                             | Pt --- C78     | 4.93             | -0.04 (-0.04)                             |
| Pt --- C107    | 4.81             | -0.06 (0.1)                               | Pt --- C79     | 5.10             | 0.001 (-0.03)                             |
| Pt --- C108    | 4.61             | -0.09 (0.08)                              | Pt --- C80     | 4.92             | -0.004 (0.02)                             |
| Pt --- C118    | 4.57             | -0.02 (-0.01)                             | Pt --- C93     | 4.73             | 0.008 (-0.01)                             |
| Pt --- C120    | 4.75             | -0.04 (-0.2)                              | Pt --- C95     | 4.95             | -0.01 (0.03)                              |
| <b>Average</b> | <b>4.61</b>      | <b><math>\Sigma = -0.2 (-0.06)</math></b> | <b>Average</b> | <b>4.92</b>      | <b><math>\Sigma = -0.03 (0.03)</math></b> |

**Table S2.** PBEPBE/NMR-DKH/IEF-PCM(UFF)  $^1\text{H}$ ,  $^{15}\text{N}$  and  $^{195}\text{Pt}$  NMR chemical shift values for the cisplatin in the geometry of structures 0 to 19 (Frames) obtained by MD simulation. All values in ppm.

| cDDP Chemical shifts ( $\delta$ ) / ppm |                             |                 |                 |                   | cDDP Chemical shifts ( $\delta$ ) / ppm |                             |                 |                 |                   |
|-----------------------------------------|-----------------------------|-----------------|-----------------|-------------------|-----------------------------------------|-----------------------------|-----------------|-----------------|-------------------|
| Frame                                   | $^1\text{H}_a$              | $^1\text{H}_b$  | $^{15}\text{N}$ | $^{195}\text{Pt}$ | Frame                                   | $^1\text{H}_a$              | $^1\text{H}_b$  | $^{15}\text{N}$ | $^{195}\text{Pt}$ |
| <b>0</b>                                | 42.5, 34.9,<br>19.6, -40.8  | -8.6,<br>-70    | 165.3,<br>160.2 | -2089             | <b>10</b>                               | 16.5, 11,<br>-22.8, -38.1   | -50.3,<br>-64.4 | 172.8,<br>164   | -2085             |
| <b>1</b>                                | 28.7, 10.3,<br>-39.6, -46.4 | -7,<br>-23      | 168.9,<br>137.4 | -2107             | <b>11</b>                               | 37.5, 20.3,<br>18, 14.4     | 16.1,<br>-23.1  | 184.4,<br>181.2 | -2076             |
| <b>2</b>                                | 43.4, 7.3,<br>1.2, -66.7    | -40,<br>-72.5   | 165.5,<br>161   | -2092             | <b>12</b>                               | 34.5, 49.1,<br>59.6, -188   | 6.5,<br>-118    | 227,<br>179     | -2072             |
| <b>3</b>                                | 63.1, 115.1,<br>45, 35.4    | 96,<br>5.8      | 191.1,<br>186.4 | -2081             | <b>13</b>                               | 97.7, 26.2,<br>26.1, -165.8 | -64.6,<br>-71.4 | 194.2,<br>171   | -2083             |
| <b>4</b>                                | 19, 16.7,<br>-25, -3.6      | -4.5,<br>-60    | 165.2,<br>159   | -2098             | <b>14</b>                               | 28.1, 25.6,<br>-32.7, -81   | -28.3,<br>-50.1 | 253.5,<br>231.5 | -2096             |
| <b>5</b>                                | 75.2, 19,<br>-4.5, 26.5     | -24.2,<br>-69.2 | 157.5,<br>155.2 | -2105             | <b>15</b>                               | 7.8, 4.3,<br>-16.9, -19.3   | -16,<br>-50     | 158,<br>155.7   | -2102             |
| <b>6</b>                                | 22.1, 8.3,<br>-31.7, -43.8  | -66,<br>-83.7   | 272.2,<br>102.1 | -2095             | <b>16</b>                               | 55.8, 54.9,<br>38.8, 36.4   | 87.7,<br>50.5   | 163,<br>161.5   | -2092             |
| <b>7</b>                                | 42.4, 17.4,<br>12.4, -43    | -31,<br>-54     | 178,<br>166.1   | -2085             | <b>17</b>                               | 53.2, 51.2,<br>47.8, -102   | 24.2,<br>-110.3 | 214.2,<br>203.8 | -2047             |
| <b>8</b>                                | 31.7, 26,<br>22.2, -42.5    | -32,<br>-40.3   | 161.4,<br>155.1 | -2087             | <b>18</b>                               | 77.4, 66.4,<br>-1.4, -154.2 | 92,<br>-33.4    | 213.7,<br>189.6 | -2074             |
| <b>9</b>                                | 44, 26.2,<br>-8.6, -55.6    | -7.8,<br>-28.5  | 188.1,<br>181.7 | -2067             | <b>19</b>                               | 33.8, 29.2,<br>11.6, 0.7    | 30,<br>9.6      | 169.6,<br>165   | -2083             |

**Table S3.** Intermolecular distance between the two water molecules and of cisplatin molecule for the selected structures (Frames) of the MD simulation.

| Frames | $^{195}\text{Pt}$ NMR $\delta$ / ppm | $d_{\text{Pt}\cdots\text{O}}$ / $\text{\AA}$ | Frames | $^{195}\text{Pt}$ NMR $\delta$ / ppm | $d_{\text{Pt}\cdots\text{O}}$ / $\text{\AA}$ |
|--------|--------------------------------------|----------------------------------------------|--------|--------------------------------------|----------------------------------------------|
| 0      | -2089                                | 4.08 / 4.34                                  | 10     | -2085                                | 4.22 / 4.79                                  |
| 1      | -2107                                | 4.41 / 4.46                                  | 11     | -2076                                | 4.40 / 4.56                                  |
| 2      | -2092                                | 4.21 / 4.73                                  | 12     | -2072                                | 4.24 / 4.25                                  |
| 3      | -2081                                | 4.20 / 4.84                                  | 13     | -2083                                | 4.31 / 4.33                                  |
| 4      | -2098                                | 4.21 / 4.82                                  | 14     | -2096                                | 3.86 / 4.58                                  |
| 5      | -2105                                | 4.32 / 4.79                                  | 15     | -2102                                | 4.10 / 4.52                                  |
| 6      | -2094                                | 4.32 / 4.72                                  | 16     | -2092                                | 4.03 / 4.30                                  |
| 7      | -2085                                | 4.08 / 4.09                                  | 17     | -2047                                | 4.13 / 4.38                                  |
| 8      | -2087                                | 3.88 / 4.67                                  | 18     | -2074                                | 4.18 / 4.30                                  |
| 9      | -2067                                | 3.98 / 4.25                                  | 19     | -2083                                | 4.10 / 4.19                                  |

**Table S4.** PBEPBE/NMR-DKH/IEF-PCM(UFF)  $^1\text{H}$  NMR chemical shift values for the oxidized region of isolated CNTox in the inclusion complex geometry and its cDDP@CNTox model obtained by MD simulation. All values in ppm. The protons indicated are shown in Figure S11.

| Structure         | Chemical shifts ( $\delta$ ) / ppm |                |                |                |                |                |
|-------------------|------------------------------------|----------------|----------------|----------------|----------------|----------------|
|                   | Carboxyls                          |                |                | Hydroxyls      |                |                |
|                   | H <sub>c</sub>                     | H <sub>d</sub> | H <sub>e</sub> | H <sub>f</sub> | H <sub>g</sub> | H <sub>h</sub> |
| <b>CNTox</b>      | 8.4                                | 9.5            | 7.3            | 12.6           | 3.8            | 11.7           |
| <b>cDDP@CNTox</b> | -1.3                               | -0.6           | 7.1            | 3.3            | 11.6           | 14.4           |

## CARTESIAN COORDINATES OF INCLUSION COMPLEXES MODELS

cDDP@CNTox

|   |             |             |            |
|---|-------------|-------------|------------|
| C | 8.25181900  | -3.81099400 | 1.39777700 |
| C | 7.59272300  | -4.10591300 | 0.18235200 |
| C | 5.42953300  | -4.15151700 | 1.40850000 |
| C | 6.15955800  | -4.28668200 | 0.19406000 |
| C | 4.01106300  | -4.34047800 | 1.41852600 |
| C | 3.33220000  | -4.69615200 | 0.21710100 |
| C | 1.18823100  | -4.74604200 | 1.44304100 |
| C | 1.92081900  | -4.90849200 | 0.22801800 |
| C | -0.22451600 | -4.95365200 | 1.45714800 |
| C | -0.90706000 | -5.34267400 | 0.25349200 |
| C | -3.08206600 | -5.00074500 | 1.38433400 |
| C | -2.35574100 | -5.40608500 | 0.24905300 |
| C | 8.09116700  | -2.46010300 | 3.44553400 |
| C | 7.50832700  | -3.34261700 | 2.50615800 |
| C | 5.26764900  | -2.78570100 | 3.43038000 |
| C | 6.07350600  | -3.50898400 | 2.50425300 |
| C | 3.84805400  | -2.96109800 | 3.43536500 |
| C | 3.23490600  | -3.87750900 | 2.52490600 |
| C | 1.01619400  | -3.32749800 | 3.47355300 |
| C | 1.82182800  | -4.06465300 | 2.53661200 |
| C | -0.39677700 | -3.51452500 | 3.50174700 |
| C | -0.98461900 | -4.46672900 | 2.58415700 |
| C | -3.23889000 | -3.66120900 | 3.23395900 |
| C | -2.38131600 | -4.54989000 | 2.52491100 |
| C | 7.82745700  | -0.27000000 | 4.53119400 |
| C | 7.28826800  | -1.50984500 | 4.11642300 |
| C | 5.00758300  | -0.60804100 | 4.51374300 |
| C | 5.85357500  | -1.67783200 | 4.10501400 |
| C | 3.58927900  | -0.78227300 | 4.52368700 |
| C | 3.01947600  | -2.02842700 | 4.12311400 |
| C | 0.75650900  | -1.14038800 | 4.58235100 |
| C | 1.60365500  | -2.20751800 | 4.13967200 |
| C | -0.65264400 | -1.32163700 | 4.62137100 |
| C | -1.24046900 | -2.57154700 | 4.18981800 |
| C | -3.49995200 | -1.56033200 | 4.31753100 |
| C | -2.67262700 | -2.67638400 | 4.06672000 |
| C | 7.53094700  | 2.17106600  | 4.40255500 |
| C | 7.00191100  | 0.87587900  | 4.60955000 |
| C | 4.71254400  | 1.81947400  | 4.41273500 |
| C | 5.56829700  | 0.69915500  | 4.60593800 |
| C | 3.29271800  | 1.64943400  | 4.43893800 |
| C | 2.73277800  | 0.35369000  | 4.64991200 |
| C | 0.46801500  | 1.32241600  | 4.52293300 |
| C | 1.31789900  | 0.18193700  | 4.68047600 |

|   |             |             |             |
|---|-------------|-------------|-------------|
| C | -0.94567000 | 1.15704300  | 4.57011800  |
| C | -1.49076900 | -0.15725400 | 4.77656200  |
| C | -3.75008600 | 0.70779600  | 4.28582100  |
| C | -2.88290300 | -0.32196400 | 4.66922300  |
| C | 7.25922100  | 4.24118200  | 3.09477600  |
| C | 6.71171100  | 3.19814000  | 3.87821000  |
| C | 4.44196800  | 3.89112000  | 3.13948600  |
| C | 5.27855700  | 3.01863900  | 3.89286300  |
| C | 3.02175200  | 3.73263200  | 3.17844700  |
| C | 2.44333300  | 2.69422900  | 3.96793800  |
| C | 0.18852000  | 3.43735800  | 3.27957200  |
| C | 1.02743100  | 2.53699800  | 4.01191300  |
| C | -1.22550800 | 3.27462400  | 3.31635100  |
| C | -1.80073900 | 2.21047200  | 4.09504500  |
| C | -3.98488700 | 2.74582200  | 3.11984300  |
| C | -3.21214500 | 1.96929600  | 3.99200300  |
| C | 7.07200700  | 5.39442200  | 0.92693900  |
| C | 6.47584900  | 4.86521200  | 2.09562400  |
| C | 4.25390600  | 5.04041000  | 0.99144200  |
| C | 5.04297100  | 4.68684400  | 2.12350100  |
| C | 2.83340000  | 4.88418300  | 1.02854800  |
| C | 2.20240400  | 4.38638700  | 2.20869500  |
| C | 0.00584800  | 4.59724300  | 1.10358700  |
| C | 0.78599600  | 4.24014700  | 2.25220600  |
| C | -1.40592300 | 4.43598500  | 1.12758000  |
| C | -2.02321900 | 3.93034500  | 2.30606000  |
| C | -4.23926500 | 3.80973300  | 1.06742000  |
| C | -3.39223600 | 3.64981400  | 2.22900000  |
| C | 7.02083500  | 5.28450900  | -1.52934900 |
| C | 6.35060700  | 5.40592200  | -0.28987900 |
| C | 4.20621500  | 4.90499600  | -1.44749600 |
| C | 4.91870700  | 5.21979100  | -0.25423200 |
| C | 2.78799600  | 4.73295800  | -1.41139700 |
| C | 2.08078600  | 4.90708200  | -0.18416900 |
| C | -0.05917000 | 4.40986600  | -1.34147900 |
| C | 0.66489100  | 4.75380500  | -0.14834700 |
| C | -1.47030700 | 4.26486900  | -1.31513400 |
| C | -2.18153300 | 4.47946100  | -0.07504300 |
| C | -4.19611400 | 4.55119600  | -1.47837700 |
| C | -3.60730700 | 4.31726300  | -0.08510000 |
| C | 7.13990300  | 3.92943700  | -3.57582200 |
| C | 6.38402500  | 4.63975200  | -2.61540800 |
| C | 4.32809500  | 3.52500700  | -3.46048100 |
| C | 4.95449700  | 4.43756900  | -2.56581300 |
| C | 2.90966700  | 3.33043300  | -3.40995300 |
| C | 2.11754300  | 4.07275400  | -2.48578600 |
| C | 0.07953000  | 2.93525000  | -3.29655000 |
| C | 0.70130200  | 3.88489500  | -2.43843600 |
| C | -1.34411500 | 2.73477300  | -3.22795300 |

|   |             |             |             |
|---|-------------|-------------|-------------|
| C | -2.14949300 | 3.53941300  | -2.37197400 |
| C | -4.17148900 | 2.32009500  | -3.02770500 |
| C | -3.59769700 | 3.41818200  | -2.36713200 |
| C | 7.40729400  | 1.73866800  | -4.65699500 |
| C | 6.58248900  | 2.80156200  | -4.22074700 |
| C | 4.59540900  | 1.34211800  | -4.53727100 |
| C | 5.15326300  | 2.59636600  | -4.15682100 |
| C | 3.17949700  | 1.14533600  | -4.49015600 |
| C | 2.32260300  | 2.20489400  | -4.05816800 |
| C | 0.35725700  | 0.75116000  | -4.40572500 |
| C | 0.91003100  | 2.00550600  | -3.99675400 |
| C | -1.04641000 | 0.55610400  | -4.36112700 |
| C | -1.92318900 | 1.59387600  | -3.86172100 |
| C | -3.83743900 | 0.07427300  | -4.01580600 |
| C | -3.32392700 | 1.37331700  | -3.69964400 |
| C | 7.75143000  | -0.69421200 | -4.52639000 |
| C | 6.89998500  | 0.42018000  | -4.71161600 |
| C | 4.93997700  | -1.07976500 | -4.44420400 |
| C | 5.47017800  | 0.22345100  | -4.65850500 |
| C | 3.52524900  | -1.28169500 | -4.42179900 |
| C | 2.64270300  | -0.17298800 | -4.59461200 |
| C | 0.71351700  | -1.69878800 | -4.40662400 |
| C | 1.23290400  | -0.37364000 | -4.56697300 |
| C | -0.69256100 | -1.90951100 | -4.40644300 |
| C | -1.55624100 | -0.76789100 | -4.53608300 |
| C | -3.51233300 | -2.18690500 | -4.07768400 |
| C | -2.93422900 | -0.95228800 | -4.40561600 |
| C | 8.06521900  | -2.76169800 | -3.22307700 |
| C | 7.24249700  | -1.89719500 | -3.98314600 |
| C | 5.25239100  | -3.15191900 | -3.18035400 |
| C | 5.81170300  | -2.09327300 | -3.95225800 |
| C | 3.83963200  | -3.36735600 | -3.17465400 |
| C | 2.99157700  | -2.51248400 | -3.93600700 |
| C | 1.02545300  | -3.82012800 | -3.19580700 |
| C | 1.58365300  | -2.72901700 | -3.93616200 |
| C | -0.38043300 | -4.04768300 | -3.21359400 |
| C | -1.23965200 | -3.15801100 | -3.95508600 |
| C | -3.20909300 | -4.30816200 | -3.02224900 |
| C | -2.67564700 | -3.29362100 | -3.83863800 |
| C | 8.24761800  | -3.91869300 | -1.05765400 |
| C | 7.49946100  | -3.56417600 | -2.20469100 |
| C | 5.43158800  | -4.29369100 | -1.02965600 |
| C | 6.06895800  | -3.76083300 | -2.18717600 |
| C | 4.01775500  | -4.50478400 | -1.02037900 |
| C | 3.24300700  | -4.20233500 | -2.18127600 |
| C | 1.19996700  | -4.96493900 | -1.00960300 |
| C | 1.83599300  | -4.43333800 | -2.18372800 |
| C | -0.20540400 | -5.19584100 | -1.00394000 |
| C | -0.95190000 | -4.91800400 | -2.21247800 |

|   |             |             |             |
|---|-------------|-------------|-------------|
| C | -3.05397900 | -5.34422400 | -0.97342600 |
| C | -2.34904700 | -5.05729000 | -2.18132400 |
| C | -5.22039500 | 2.30217700  | 2.58978600  |
| C | -5.45584300 | 3.03431200  | 1.36275900  |
| C | -5.66318800 | 5.03593700  | -1.42224300 |
| C | -6.56544300 | 2.64560300  | 0.56021100  |
| C | -5.63445600 | 1.94668400  | -3.22671100 |
| C | -5.01966500 | -0.51301400 | -3.52307100 |
| C | -6.10729800 | 0.41457200  | -3.04330500 |
| C | -4.81570200 | -1.95122300 | -3.45474300 |
| C | -5.29002900 | -2.99814400 | -2.58302700 |
| C | -4.46425200 | -4.11597500 | -2.36066200 |
| C | -4.35378900 | -4.77480400 | -1.04725000 |
| C | -4.39901700 | -4.37532900 | 1.34978200  |
| C | -5.07664200 | -4.34308300 | 0.09450300  |
| C | -4.47583800 | -3.51650100 | 2.54720700  |
| C | -5.24521600 | -2.27341900 | 2.69656400  |
| C | -4.76053400 | -1.32342900 | 3.71084100  |
| C | -4.96609200 | 0.15520300  | 3.68793600  |
| C | -5.80704600 | 1.04536300  | 2.97067800  |
| C | -7.94891800 | -0.42170600 | 2.43829100  |
| C | -7.29164100 | 0.97693800  | 2.59852500  |
| C | -7.64421100 | 1.89383600  | 1.37155900  |
| C | -6.47191700 | -2.97356900 | -1.67423800 |
| C | -6.38159400 | -3.72352500 | -0.26750900 |
| O | -8.81764000 | 2.07754500  | 1.13170200  |
| O | -7.52870800 | -2.44823400 | -1.94872600 |
| C | -6.39327500 | 0.18628600  | -1.55267900 |
| O | -5.51078400 | 0.00513100  | -0.73215200 |
| O | -7.67914700 | 0.19565300  | -1.28384100 |
| H | -7.84943300 | -0.08175300 | -0.34609600 |
| O | -7.25216500 | 0.23531300  | -3.82959500 |
| H | -7.99158300 | 0.67899400  | -3.38430100 |
| O | -3.60913000 | 5.79542600  | -1.93949800 |
| H | -3.90925100 | 5.92924600  | -2.85264200 |
| O | -6.18062400 | 5.15467600  | -2.64520200 |
| H | -7.03219500 | 5.62038900  | -2.56897300 |
| O | -6.15449100 | 5.53125700  | -0.43809400 |
| O | -6.44702600 | 2.70457700  | -3.68535000 |
| O | -6.77179400 | 2.86314300  | -0.63586900 |
| O | -7.40456900 | -3.80194400 | 0.37801500  |
| O | -6.11545400 | -1.94466100 | 1.87127600  |
| O | -7.92635200 | 1.60061300  | 3.71403200  |
| H | -8.84734900 | 1.77496400  | 3.45438500  |
| O | -8.24024000 | -0.75312200 | 1.15612300  |
| O | -8.30647700 | -1.07179400 | 3.38101400  |
| H | -8.29826200 | -1.72891400 | 1.09056200  |
| H | 8.61510600  | 2.30574000  | 4.40031200  |
| H | 8.91243100  | -0.14190500 | 4.53836000  |

|    |             |             |             |
|----|-------------|-------------|-------------|
| H  | 8.34315100  | 4.37697100  | 3.07891300  |
| H  | 8.15532100  | 5.53392600  | 0.90127200  |
| H  | 8.10257400  | 5.43372300  | -1.56320800 |
| H  | 8.22054400  | 4.08372100  | -3.61962500 |
| H  | 8.48799700  | 1.89250200  | -4.70144600 |
| H  | 8.83319500  | -0.54506700 | -4.56097600 |
| H  | 9.14751000  | -2.61382600 | -3.24156400 |
| H  | 9.33127800  | -3.78016900 | -1.06783300 |
| H  | 9.33658300  | -3.68126600 | 1.39516700  |
| H  | 9.17638300  | -2.33472300 | 3.45121800  |
| Pt | -1.25953200 | -0.42532100 | 0.01648500  |
| N  | -2.94718800 | 0.69603000  | 0.49695800  |
| H  | -2.72682600 | 1.69338400  | 0.43078400  |
| H  | -3.77812100 | 0.51189700  | -0.08636400 |
| N  | -2.47352300 | -2.01883600 | -0.53931900 |
| H  | -1.87467500 | -2.75394200 | -0.92622500 |
| H  | -2.98869500 | -2.41706100 | 0.25230100  |
| H  | -3.22538000 | 0.51615000  | 1.46660400  |
| H  | -3.16050100 | -1.75941900 | -1.25460700 |
| Cl | 0.65019100  | -1.73181100 | -0.50872800 |
| Cl | 0.12278700  | 1.38361200  | 0.63765100  |

cDDP@CNCox

|   |             |             |             |
|---|-------------|-------------|-------------|
| C | 1.32295400  | 10.02790600 | 4.01665500  |
| C | 1.80763000  | 11.34255800 | 3.66794400  |
| C | -1.50916100 | 6.14834600  | 2.71931700  |
| C | -0.90555000 | 7.40449100  | 2.40168300  |
| C | -0.06904500 | 8.07119900  | 3.35390600  |
| C | 0.41403700  | 9.84302600  | 1.71885100  |
| C | 0.51582800  | 9.34024900  | 3.04258400  |
| C | 1.10127900  | 11.05672000 | 1.34573800  |
| C | 1.69905200  | 11.83647000 | 2.40200100  |
| C | -4.48057600 | 2.35219300  | 1.58936800  |
| C | -3.85631400 | 3.56177500  | 1.08960100  |
| C | -2.96210300 | 4.21940300  | 2.05648400  |
| C | -2.38153500 | 5.96135700  | 0.43040500  |
| C | -2.33820800 | 5.47161700  | 1.75937300  |
| C | -1.62150800 | 7.11760200  | 0.06933400  |
| C | -0.97711600 | 7.89802700  | 1.07450000  |
| C | -0.00379200 | 9.35740000  | -0.65661900 |
| C | -0.24040500 | 9.06928500  | 0.71330900  |
| C | 0.84165900  | 10.47111800 | -1.02202400 |
| C | 1.27176200  | 11.36731300 | 0.00291900  |
| C | -7.26358300 | -0.12656400 | 0.46398800  |
| C | -6.48368500 | 0.72288700  | 1.50294700  |
| C | -6.23128900 | 3.18637800  | -0.95848800 |
| C | -5.23361100 | 1.36155000  | 0.79017600  |
| C | -4.95658400 | 3.91565500  | -1.43050100 |



|   |             |             |             |
|---|-------------|-------------|-------------|
| C | -3.97611100 | 4.16476100  | -0.22600100 |
| C | -2.69067700 | 5.40802000  | -1.93738400 |
| C | -3.07134400 | 5.20867800  | -0.56575900 |
| C | -1.75227500 | 6.41890700  | -2.27186700 |
| C | -1.33841100 | 7.37549700  | -1.29471200 |
| C | 0.15949700  | 8.46257300  | -2.93245200 |
| C | -0.45107400 | 8.43996400  | -1.65101400 |
| C | 1.12615400  | 9.48458200  | -3.25137400 |
| C | 1.34823300  | 10.54097400 | -2.32717600 |
| C | -7.89359200 | -0.10310200 | -4.35652600 |
| C | -8.04076000 | 1.37038100  | -3.88812300 |
| C | -5.47756000 | 1.61769400  | -3.89330500 |
| C | -6.78846100 | 2.27231000  | -3.87299100 |
| C | -4.29056800 | 2.41480600  | -3.63724700 |
| C | -4.12269600 | 3.48509500  | -2.68633500 |
| C | -2.10734400 | 4.21621400  | -3.98128800 |
| C | -3.02567500 | 4.38179900  | -2.89465700 |
| C | -1.09414600 | 5.18341600  | -4.27104400 |
| C | -1.01293100 | 6.36463800  | -3.49413000 |
| C | 0.92583600  | 7.11369900  | -4.83133600 |
| C | -0.02164500 | 7.34803300  | -3.79869700 |
| C | 1.95788000  | 8.08955400  | -5.09732200 |
| C | 1.96441900  | 9.30551400  | -4.36957800 |
| C | -6.14086500 | -2.05679800 | -4.18660500 |
| C | -6.48183200 | -0.68941800 | -4.22401700 |
| C | -4.10559700 | -0.15265400 | -4.87354000 |
| C | -5.38282200 | 0.27663400  | -4.38181100 |
| C | -3.04217000 | 0.76745000  | -5.01610400 |
| C | -3.15248600 | 2.06958200  | -4.46157100 |
| C | -0.94200400 | 2.61093900  | -5.43354500 |
| C | -2.08881800 | 2.98169100  | -4.66735400 |
| C | 0.08682000  | 3.55738400  | -5.68605800 |
| C | -0.04759700 | 4.88256000  | -5.19144600 |
| C | 2.14547800  | 5.45567800  | -6.17687300 |
| C | 0.98126200  | 5.83924400  | -5.45433200 |
| C | 3.19682600  | 6.41507200  | -6.41131600 |
| C | 3.03827700  | 7.73847800  | -5.93681400 |
| C | -4.55768200 | -3.77337900 | -4.55781300 |
| C | -4.85745800 | -2.42143500 | -4.76477300 |
| C | -2.52779000 | -2.01944100 | -5.33740300 |
| C | -3.85337000 | -1.52235100 | -5.12002300 |
| C | -1.49615000 | -1.08082100 | -5.59894000 |
| C | -1.78171600 | 0.31296300  | -5.52931200 |
| C | 0.56321500  | 0.79496700  | -6.12686900 |
| C | -0.73861400 | 1.24722100  | -5.76100700 |
| C | 1.59297800  | 1.74427500  | -6.38934900 |
| C | 1.32357600  | 3.13453200  | -6.25472200 |
| C | 3.65402400  | 3.64464300  | -6.89094900 |
| C | 2.36103400  | 4.08933100  | -6.49617800 |

|   |             |             |             |
|---|-------------|-------------|-------------|
| C | 4.70534200  | 4.60473200  | -7.14042500 |
| C | 4.42831000  | 5.97742000  | -6.95831800 |
| C | -2.90589700 | -5.33096700 | -3.66064700 |
| C | -3.22048100 | -4.24811400 | -4.54299100 |
| C | -0.82490800 | -3.70743800 | -4.74506600 |
| C | -2.19583400 | -3.36765900 | -4.98625400 |
| C | 0.19932400  | -2.81716600 | -5.18686700 |
| C | -0.14192300 | -1.52263500 | -5.67977100 |
| C | 2.24773700  | -0.98941900 | -5.97202100 |
| C | 0.88118700  | -0.58647500 | -5.99888300 |
| C | 3.26845400  | -0.05298700 | -6.32309600 |
| C | 2.93168000  | 1.30187700  | -6.59456700 |
| C | 5.31651800  | 1.82931000  | -6.96280900 |
| C | 3.96034000  | 2.25718800  | -6.87113300 |
| C | 6.35903100  | 2.78081800  | -7.28277600 |
| C | 6.01786400  | 4.14157900  | -7.41722700 |
| C | -2.44669900 | -6.53670700 | -1.11279200 |
| C | -1.32397900 | -6.13246000 | -1.92845900 |
| C | -1.56367300 | -5.50398300 | -3.19925700 |
| C | 0.83004900  | -4.88715900 | -3.34526500 |
| C | -0.50787600 | -4.76285900 | -3.83203200 |
| C | 1.88233100  | -4.14411000 | -3.97264500 |
| C | 1.56626100  | -3.11643700 | -4.91008200 |
| C | 3.95736000  | -2.51557200 | -5.07991100 |
| C | 2.59258000  | -2.24045600 | -5.38446300 |
| C | 4.98298500  | -1.64463600 | -5.56631500 |
| C | 4.63823700  | -0.42771000 | -6.21565000 |
| C | 7.03326900  | 0.14240700  | -6.44037700 |
| C | 5.66170700  | 0.50198700  | -6.59058300 |
| C | 8.06828400  | 1.05405700  | -6.87278600 |
| C | 7.70763400  | 2.33279000  | -7.32145200 |
| C | -4.64770900 | -5.58573100 | 2.84575800  |
| C | -3.40793700 | -6.07763300 | 2.42822400  |
| C | -3.47612800 | -6.57218400 | 1.07101900  |
| C | -1.02006900 | -6.41082700 | 0.91322200  |
| C | -2.29056800 | -6.63980500 | 0.30071500  |
| C | 0.13245600  | -6.23567800 | 0.08673600  |
| C | -0.02603100 | -6.05992700 | -1.33529700 |
| C | 2.38082100  | -5.48241100 | -1.51965600 |
| C | 1.07588000  | -5.54836200 | -2.10121300 |
| C | 3.47517000  | -4.94972800 | -2.27261500 |
| C | 3.22300500  | -4.26648500 | -3.49848800 |
| C | 5.61403800  | -3.64502100 | -3.65294600 |
| C | 4.27306500  | -3.52423000 | -4.12696700 |
| C | 6.66315200  | -2.89890900 | -4.27712700 |
| C | 6.34589000  | -1.90207200 | -5.23834300 |
| C | 8.74154400  | -1.31070800 | -5.41609600 |
| C | 7.37671300  | -1.04498900 | -5.74162600 |
| C | 9.77520500  | -0.47800700 | -5.98511200 |

|   |             |             |             |
|---|-------------|-------------|-------------|
| C | 9.43040400  | 0.65417600  | -6.71295700 |
| C | -6.42907000 | -1.27229300 | 3.16956000  |
| C | -5.55608100 | -2.21049900 | 3.83434900  |
| C | -5.84006900 | -3.60540000 | 3.88190200  |
| C | -3.41737900 | -3.99934300 | 4.23314800  |
| C | -4.70541900 | -4.47012900 | 3.73633400  |
| C | -2.19456500 | -4.71713800 | 4.00407100  |
| C | -2.16957800 | -5.72549200 | 2.99849600  |
| C | 0.27840900  | -5.58738200 | 2.85642300  |
| C | -0.95622500 | -6.01328500 | 2.29678000  |
| C | 1.48337800  | -5.71130000 | 2.09847800  |
| C | 1.40170100  | -5.97206900 | 0.69492200  |
| C | 3.82433700  | -5.50867400 | 0.48729000  |
| C | 2.55038200  | -5.73051500 | -0.12194800 |
| C | 4.96405200  | -5.21443200 | -0.32326000 |
| C | 4.78441100  | -4.90418100 | -1.70038000 |
| C | 7.18354100  | -4.31238600 | -1.87760500 |
| C | 5.87162700  | -4.34609300 | -2.44354100 |
| C | 8.26832400  | -3.73986600 | -2.61295800 |
| C | 8.00663700  | -3.02450800 | -3.80909500 |
| C | 10.42436000 | -2.46968100 | -4.01164100 |
| C | 9.06357500  | -2.29530600 | -4.44646800 |
| C | 11.44876100 | -1.76202800 | -4.74358000 |
| C | 11.14372900 | -0.81805300 | -5.67951500 |
| C | -4.70103700 | 0.46011700  | 3.23144900  |
| C | -5.90173600 | -0.05809900 | 2.69156900  |
| C | -3.96507800 | -0.35413700 | 4.13796500  |
| C | -4.29160700 | -1.73009500 | 4.27199800  |
| C | -2.05283400 | -2.16294200 | 5.18952300  |
| C | -3.28409000 | -2.65147100 | 4.67044900  |
| C | -0.91170600 | -3.00643500 | 5.24105400  |
| C | -0.94947000 | -4.22953900 | 4.51143400  |
| C | 1.52026000  | -4.29470800 | 4.56422700  |
| C | 0.28142400  | -4.78201000 | 4.04268700  |
| C | 2.75161300  | -4.69062000 | 3.96334000  |
| C | 2.72830900  | -5.32751900 | 2.68401100  |
| C | 5.17389000  | -5.01070000 | 2.50075200  |
| C | 3.92112700  | -5.35802500 | 1.90292700  |
| C | 6.35387100  | -4.96057400 | 1.70245900  |
| C | 6.24308700  | -5.01828900 | 0.28594000  |
| C | 8.65830600  | -4.50449400 | 0.08675000  |
| C | 7.37139200  | -4.67402600 | -0.51729200 |
| C | 9.78255800  | -4.14178300 | -0.71767800 |
| C | 9.59140800  | -3.73846500 | -2.06386800 |
| C | 12.01011700 | -3.31665600 | -2.25120500 |
| C | 10.68954400 | -3.20046400 | -2.82389100 |
| C | -3.09563200 | 2.30000100  | 3.62122500  |
| C | -4.14028800 | 1.74760900  | 2.82251800  |
| C | -2.44895600 | 1.50971600  | 4.61540200  |

|   |             |             |             |
|---|-------------|-------------|-------------|
| C | -2.79251000 | 0.13946300  | 4.76896500  |
| C | -0.67406400 | -0.26680200 | 5.94827300  |
| C | -1.88150800 | -0.76124700 | 5.37942700  |
| C | 0.40074800  | -1.15871800 | 6.21784400  |
| C | 0.32589600  | -2.49818600 | 5.73494500  |
| C | 2.76769200  | -2.70298300 | 5.99744800  |
| C | 1.52918700  | -3.22040800 | 5.50591000  |
| C | 3.99431200  | -3.29627300 | 5.58805100  |
| C | 3.99011800  | -4.22605000 | 4.50688000  |
| C | 6.45507100  | -4.06545800 | 4.39427500  |
| C | 5.21284000  | -4.50412800 | 3.83022600  |
| C | 7.66710200  | -4.25001200 | 3.66993800  |
| C | 7.61319200  | -4.64211400 | 2.30722900  |
| C | 10.06533600 | -4.26897600 | 2.11382000  |
| C | 8.78340000  | -4.52966600 | 1.49896500  |
| C | 11.21282900 | -4.14786200 | 1.27232600  |
| C | 11.08746500 | -4.04539700 | -0.10667700 |
| C | 12.20248400 | -3.72418000 | -0.96432500 |
| C | -1.59924800 | 4.17011300  | 4.15263300  |
| C | -2.58928600 | 3.58502900  | 3.28619600  |
| C | -0.97238100 | 3.38848600  | 5.16445400  |
| C | -1.32558800 | 2.02143500  | 5.32068000  |
| C | 0.72911400  | 1.63772500  | 6.63191000  |
| C | -0.46177600 | 1.13719800  | 6.02769800  |
| C | 1.75194100  | 0.73756000  | 7.03574400  |
| C | 1.63324800  | -0.64714400 | 6.72139600  |
| C | 4.03847100  | -0.94044500 | 7.18663900  |
| C | 2.79660200  | -1.46450000 | 6.70412000  |
| C | 5.23897000  | -1.66526500 | 6.96976000  |
| C | 5.23355800  | -2.78695500 | 6.09606400  |
| C | 7.71559900  | -2.78384600 | 6.10233800  |
| C | 6.46221100  | -3.27062400 | 5.57138400  |
| C | 8.92962800  | -3.18683500 | 5.49102900  |
| C | 8.93083300  | -3.85576200 | 4.25381600  |
| C | 10.11851200 | -3.99210900 | 3.48554000  |
| C | -0.14498900 | 6.07435400  | 4.77959100  |
| C | -1.12626500 | 5.48886500  | 3.91294700  |
| C | 0.48576000  | 5.28239100  | 5.77352300  |
| C | 0.12957400  | 3.91300300  | 5.91087700  |
| C | 2.14693100  | 3.54573200  | 7.29235500  |
| C | 0.96721800  | 3.04024600  | 6.65759400  |
| C | 3.13149800  | 2.64575800  | 7.78057000  |
| C | 2.98079300  | 1.24629000  | 7.56367600  |
| C | 5.34643800  | 0.91010300  | 8.20926500  |
| C | 4.09754400  | 0.38242200  | 7.70909200  |
| C | 6.50236900  | 0.10060700  | 8.14270000  |
| C | 6.49111600  | -1.13770900 | 7.45960600  |
| C | 7.69834400  | -1.77741100 | 7.09021600  |
| C | 1.29326800  | 7.99380200  | 5.41177600  |

|   |             |             |             |
|---|-------------|-------------|-------------|
| C | 0.31838200  | 7.40095900  | 4.54253600  |
| C | 1.92088100  | 7.19400300  | 6.40343700  |
| C | 1.57905900  | 5.81548200  | 6.52999300  |
| C | 3.55993000  | 5.46722600  | 7.98539000  |
| C | 2.39843300  | 4.94765800  | 7.29952300  |
| C | 4.49195900  | 4.56772100  | 8.52400200  |
| C | 4.35375300  | 3.16282300  | 8.35473800  |
| C | 5.41537200  | 2.27006700  | 8.60525700  |
| C | 2.65520900  | 9.90912500  | 6.14765300  |
| C | 1.72032200  | 9.35007100  | 5.19903800  |
| C | 3.25970700  | 9.14456800  | 7.10120800  |
| C | 2.99038900  | 7.73187100  | 7.21228800  |
| C | 3.76648000  | 6.88049800  | 7.98945400  |
| C | -3.97012600 | -5.87711200 | -2.89945600 |
| C | -3.75731400 | -6.42894700 | -1.62164500 |
| C | -4.98650700 | -6.27389200 | -0.82084100 |
| C | -4.78496000 | -6.39284400 | 0.57270300  |
| C | -5.61627700 | -4.29834400 | -3.76131100 |
| C | -5.30267000 | -5.37257900 | -2.91267900 |
| C | -6.60967200 | -3.30642000 | -3.51596600 |
| C | -5.96105700 | -5.61273400 | -1.68058700 |
| C | -5.61866100 | -5.89913400 | 1.74471100  |
| C | -7.20720800 | -4.85193600 | -1.48375800 |
| C | -7.77387400 | -5.39167200 | 4.21155000  |
| C | -7.32870700 | -3.47778200 | -2.29051700 |
| C | -9.07419200 | -0.97497400 | -3.86758500 |
| C | -7.32138900 | -3.94259100 | 3.98089400  |
| C | -7.80509500 | -1.67497400 | 2.87646500  |
| C | -8.12771300 | -3.19151500 | 2.90007100  |
| O | -8.08165600 | 0.09392000  | -5.77169300 |
| H | -8.04088000 | -0.77872200 | -6.19564200 |
| O | -9.85312400 | -0.70989400 | -2.99432400 |
| O | -9.17750900 | -2.05590600 | -4.65795700 |
| H | -9.93968300 | -2.58420800 | -4.36137900 |
| O | -8.99556800 | -3.62474100 | 2.19275300  |
| O | -7.97983500 | -2.57719600 | -1.72203600 |
| O | -9.11346100 | 1.86602200  | -3.67352900 |
| O | -7.31926600 | 1.78547500  | 1.92627100  |
| H | -8.14557000 | 1.36824500  | 2.23201900  |
| O | -8.30351300 | 0.26011400  | -0.00256700 |
| O | -6.68407100 | -1.28404700 | 0.15774100  |
| H | -7.25983000 | -1.77770200 | -0.51395100 |
| O | -8.69295700 | -0.88394600 | 2.59142300  |
| O | -6.95020600 | 3.48203200  | -3.94580300 |
| O | -4.84210000 | 0.96169000  | -0.28969600 |
| O | -6.82905900 | 2.28184100  | -1.49079600 |
| O | -6.67144800 | 3.74977000  | 0.16868800  |
| H | -7.32558000 | 3.15344200  | 0.60234900  |
| O | -5.52260000 | 5.21271400  | -1.75851800 |

|    |             |             |             |
|----|-------------|-------------|-------------|
| H  | -5.97892200 | 5.08251000  | -2.61011500 |
| O  | -8.12486100 | -5.12217800 | -0.72614300 |
| O  | -7.75821900 | -3.25262400 | 5.18749800  |
| H  | -8.70025000 | -3.45801400 | 5.32002200  |
| O  | -6.81890400 | -5.70331100 | 1.75832300  |
| O  | -8.93853800 | -5.70834700 | 4.15908000  |
| O  | -6.81487000 | -6.19631300 | 4.66799200  |
| H  | -7.22335300 | -7.05557500 | 4.88114900  |
| H  | 2.32122300  | 11.94045000 | 4.42060200  |
| H  | 2.12631900  | 12.81098300 | 2.15408200  |
| H  | 1.84905100  | 12.25178500 | -0.27716000 |
| H  | 2.03672900  | 11.34593100 | -2.59449800 |
| H  | 2.72136600  | 10.05981400 | -4.59789400 |
| H  | 3.82448400  | 8.47273600  | -6.12965500 |
| H  | 5.21761800  | 6.71038500  | -7.14330200 |
| H  | 6.80320100  | 4.86996700  | -7.63312800 |
| H  | 8.49014900  | 3.03992900  | -7.60651700 |
| H  | 10.21897600 | 1.30661500  | -7.09623400 |
| H  | 11.94245800 | -0.26148300 | -6.17586600 |
| H  | 12.49726900 | -1.94557300 | -4.50925200 |
| H  | 12.87788300 | -3.02552600 | -2.84306300 |
| H  | 13.20991200 | -3.75071700 | -0.54204600 |
| H  | 12.19415800 | -4.01853700 | 1.73527100  |
| H  | 11.07775100 | -3.74281600 | 3.94549700  |
| H  | 9.87717100  | -2.85208800 | 5.91973500  |
| H  | 8.64487500  | -1.39661900 | 7.48202700  |
| H  | 7.45070300  | 0.49145900  | 8.51952900  |
| H  | 6.35259200  | 2.65680800  | 9.01292800  |
| H  | 5.39533100  | 4.95582800  | 9.00065400  |
| H  | 4.60579800  | 7.28842900  | 8.55810500  |
| H  | 4.00177700  | 9.58801700  | 7.76947600  |
| H  | 2.92748200  | 10.96184300 | 6.07296600  |
| Pt | -2.39775500 | -1.84236100 | -0.31011000 |
| N  | -3.88727600 | -2.82457700 | 0.76705900  |
| H  | -3.55379600 | -2.98460300 | 1.72135900  |
| H  | -4.77233200 | -2.30374400 | 0.80990700  |
| N  | -3.80160700 | -1.31110400 | -1.73934900 |
| H  | -4.36418100 | -2.09511000 | -2.07661700 |
| H  | -4.43528700 | -0.59340500 | -1.36091100 |
| H  | -4.09661500 | -3.74085000 | 0.35782800  |
| H  | -3.31418200 | -0.90585500 | -2.54238300 |
| Cl | -0.76885400 | -0.72587100 | -1.64733600 |
| Cl | -0.86537400 | -2.40304200 | 1.43027800  |
